# Supplementary material for: P. gingivalis in oral-prostate axis exacerbates benign prostatic hyperplasia via IL-6/IL-6R pathway
Source: PubMed Central journal article supplement (PMC11103868; doi:10.1186/s40779-024-00533-8), 2024-05-20
Supplement: 40779_2024_533_MOESM1_ESM.pdf [file 40779_2024_533_MOESM1_ESM.pdf]

1 **Table S1** Antibodies used for immunofluorescence (IF) and immunohistochemistry  
 2 staining (IHC)

| Antibodies                                            | Source species | Dilution ratio * | Supplier              |
|-------------------------------------------------------|----------------|------------------|-----------------------|
| <b>Primary antibody</b>                               |                |                  |                       |
| Ki67                                                  | Rabbit         | 1:500 (IHC)      | Servicebioe, GB111141 |
| IL-6                                                  | Rabbit         | 1:100 (IF/IHC)   | Abclonal, A0286       |
| IL-6R $\alpha$                                        | Mouse          | 1:100 (IF/IHC)   | Santa Cruz, sc-373708 |
| gp130                                                 | Rabbit         | 1:100 (IF/IHC)   | Abclonal, A14656      |
| <b>Secondary antibody</b>                             |                |                  |                       |
| Anti-rabbit IgG H&L<br>(Alexa Fluor <sup>®</sup> 555) | Goat           | 1:1000 (IF)      | Abacm, ab150078       |
| Anti-mouse IgG H&L<br>(Alexa Fluor <sup>®</sup> 647)  | Goat           | 1:1000 (IF)      | Abacm, ab150115       |
| Anti-mouse-IgG-HRP                                    | Goat           | 1:200 (IHC)      | Servicebio, GB23301   |
| Anti-rabbit-IgG-HRP                                   | Goat           | 1:200 (IHC)      | Servicebio, GB23303   |

3 \*Primary antibody dilution buffer for IF, Beyotime Biotechnology (P0023A); Primary  
 4 antibody dilution buffer for IHC, Servicebio (G20250); Secondary antibody dilution  
 5 buffer for IF, PBST; Secondary antibody dilution buffer for IHC, PBS Solution. *IL-6*  
 6 interleukin-6, *IL-6R $\alpha$*  interleukin-6 receptor- $\alpha$

9 **Table S2** Primers and RNA oligonucleotides sequences used in this study.

| Gene (human)                    | Forward primer (5' – 3') | Reverse primer (5' – 3') |
|---------------------------------|--------------------------|--------------------------|
| <i>IL-6</i>                     | ACCTTCCAAAGATGGCTGAA     | GGCTTGTTCTCACTACTCTCAA   |
| <i>IL-6R<math>\alpha</math></i> | ACTTGCTGGTGGATGTTCCC     | AGCCTTTGTCGTCAGGGATG     |
| si IL-6R $\alpha$ -593          | GGAAGACAAUGCCACUGUUTT    | AACAGUGGCAUUGUCUUCCTT    |
| si IL-6R $\alpha$ -815          | CCUCAGCAAUGUUGUUUGUTT    | ACAAACAACAUUGCUGAGGTT    |
| <i><math>\beta</math>-actin</i> | CCACACCCGCCACCAGTTC      | GACCCATTCCCACCATCACACC   |

10 *IL-6* interleukin-6, *IL-6R $\alpha$*  interleukin-6 receptor- $\alpha$

11

12

13

14 **Table S3** Antibodies used for Western blotting analysis

| Antibodies                     | Source species | Dilution ratio* | Supplier                      |
|--------------------------------|----------------|-----------------|-------------------------------|
| <b>Primary antibody</b>        |                |                 |                               |
| IL-6R $\alpha$                 | Rabbit         | 1:1000          | Santa Cruz, sc-373708         |
| gp130                          | Rabbit         | 1:1000          | Abcam, ab283685               |
| Akt                            | Mouse          | 1:1000          | Santa Cruz, sc-81434          |
| p-Akt                          | Rabbit         | 1:2000          | Santa Cruz, sc-514032         |
| Cyclin D1                      | Rabbit         | 1:1000          | Abcam, ab16663                |
| CDK4                           | Mouse          | 1:1000          | Santa Cruz, sc-23896          |
| Bcl-2                          | Rabbit         | 1:1000          | Abcam, ab196495               |
| GAPDH                          | Rabbit         | 1:10000         | Abcam, ab181602               |
| <b>Secondary antibody</b>      |                |                 |                               |
| Anti-mouse-IgG<br>(H + L)-HRP  | Goat           | 1:10000         | Beyotime Biotechnology, A0216 |
| Anti-rabbit-IgG<br>(H + L)-HRP | Goat           | 1:10000         | Beyotime Biotechnology, A0208 |

15 \*Primary antibody dilution buffer, Beyotime Biotechnology (P0023A); Secondary  
 16 antibody dilution buffer, 1 $\times$  TBST (Solarbio, T1081). *IL-6R $\alpha$*  interleukin-6 receptor- $\alpha$

17

18

19 **Table S4** Top 10 species of subgingival plaque (Sp) and prostatic fluid (Pf)

| Sp                                   |                         | Prostatic fluid                     |                         |
|--------------------------------------|-------------------------|-------------------------------------|-------------------------|
| Top 10 species                       | Mean relative abundance | Top 10 species                      | Mean relative abundance |
| <i>s__Porphyromonas gingivalis</i>   | 33.89%                  | <i>s__Escherichia fergusonii</i>    | 13.83%                  |
| <i>s__Bacteroides fragilis</i>       | 26.79%                  | <i>s__Pseudomonas aeruginosa</i>    | 12.42%                  |
| <i>s__Gemella morbillorum</i>        | 13.03%                  | <i>s__Weissella hellenica</i>       | 11.95%                  |
| <i>s__Capnocytophaga ochracea</i>    | 4.10%                   | <i>s__Porphyromonas gingivalis</i>  | 7.31%                   |
| <i>s__Veillonella parvula</i>        | 2.88%                   | <i>s__Bacteroides fragilis</i>      | 5.38%                   |
| <i>s__Staphylococcus epidermidis</i> | 1.93%                   | <i>s__Lactobacillus plantarum</i>   | 1.58%                   |
| <i>s__Weissella hellenica</i>        | 1.64%                   | <i>s__Lactobacillus leichmannii</i> | 0.90%                   |
| <i>s__Granulicatella adiacens</i>    | 1.11%                   | <i>s__Streptococcus oralis</i>      | 0.73%                   |
| <i>s__Parvimonas micra</i>           | 1.11%                   | <i>s__Enterococcus mundtii</i>      | 0.65%                   |
| <i>s__Prevotella loescheii</i>       | 0.91%                   | <i>s__Gemella morbillorum</i>       | 0.63%                   |

20

21 **Table S5** Detection of oral pathogens in subgingival plaque (Sp) and prostatic fluid (Pf)  
 22 of each patient

| Patients | <i>Porphyromonas gingivalis</i> |    | <i>Bacteroides fragilis</i> |    | <i>Capnocytophaga ochracea</i> |    | <i>Parvimonas micra</i> |    | <i>Streptococcus oralis</i> |    |
|----------|---------------------------------|----|-----------------------------|----|--------------------------------|----|-------------------------|----|-----------------------------|----|
|          | Sp                              | Pf | Sp                          | Pf | Sp                             | Pf | Sp                      | Pf | Sp                          | Pf |
| 1        | -                               | -  | +                           | +  | -                              | -  | -                       | -  | -                           | -  |
| 2        | +                               | +  | +                           | +  | -                              | +  | +                       | +  | +                           | -  |
| 3        | +                               | +  | -                           | +  | +                              | -  | -                       | -  | -                           | +  |
| 4        | +                               | +  | -                           | +  | -                              | +  | -                       | +  | -                           | +  |
| 5        | +                               | +  | -                           | +  | -                              | +  | -                       | +  | -                           | +  |
| 6        | -                               | -  | -                           | +  | +                              | +  | +                       | -  | -                           | -  |
| 7        | +                               | +  | +                           | +  | -                              | +  | -                       | +  | -                           | -  |
| 8        | -                               | -  | +                           | +  | -                              | +  | +                       | -  | -                           | -  |

23 “+” indicate the bacteria were detected; “-“ indicate the bacteria were not detected

24

25

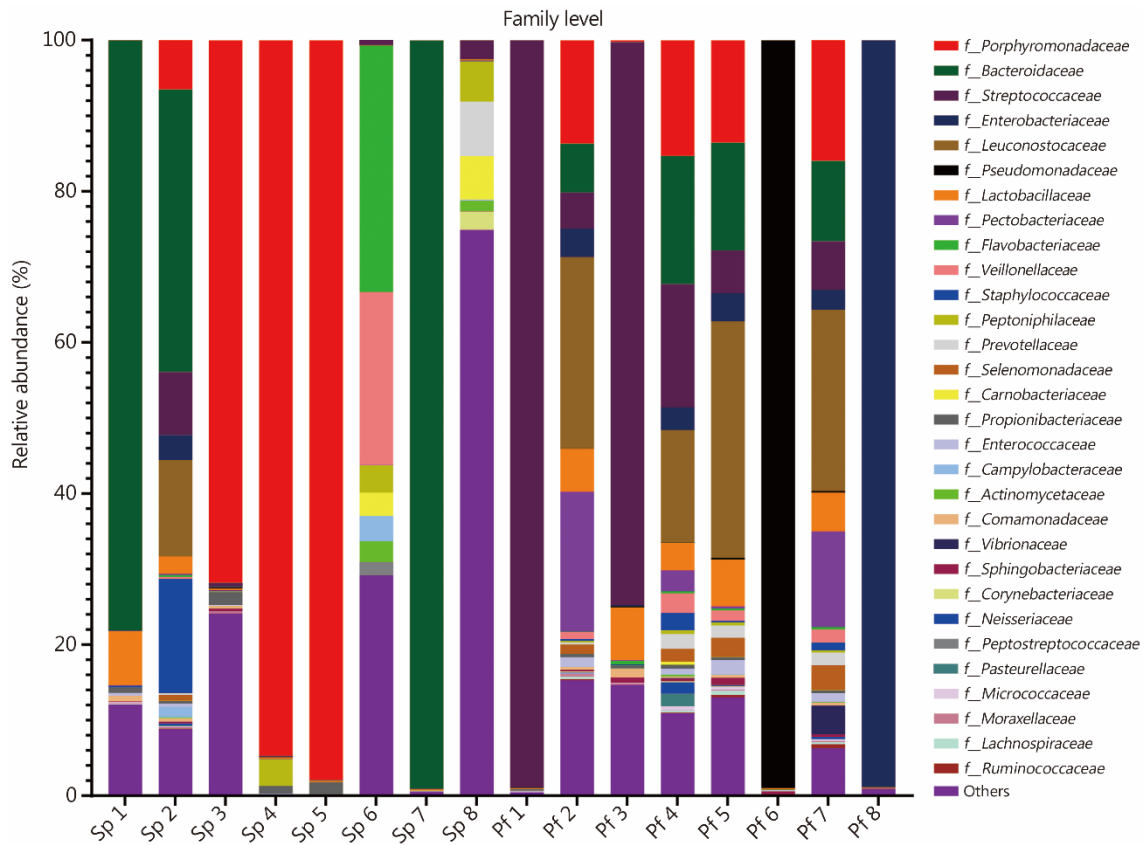

27

28 **Fig. S1** Relative abundance of microbial composition at the family level in all samples.

29 Each bar represents a subject sample and each colored box represents a bacterial family.

30 Sp subgingival plaque, Pf prostatic fluid

31

32

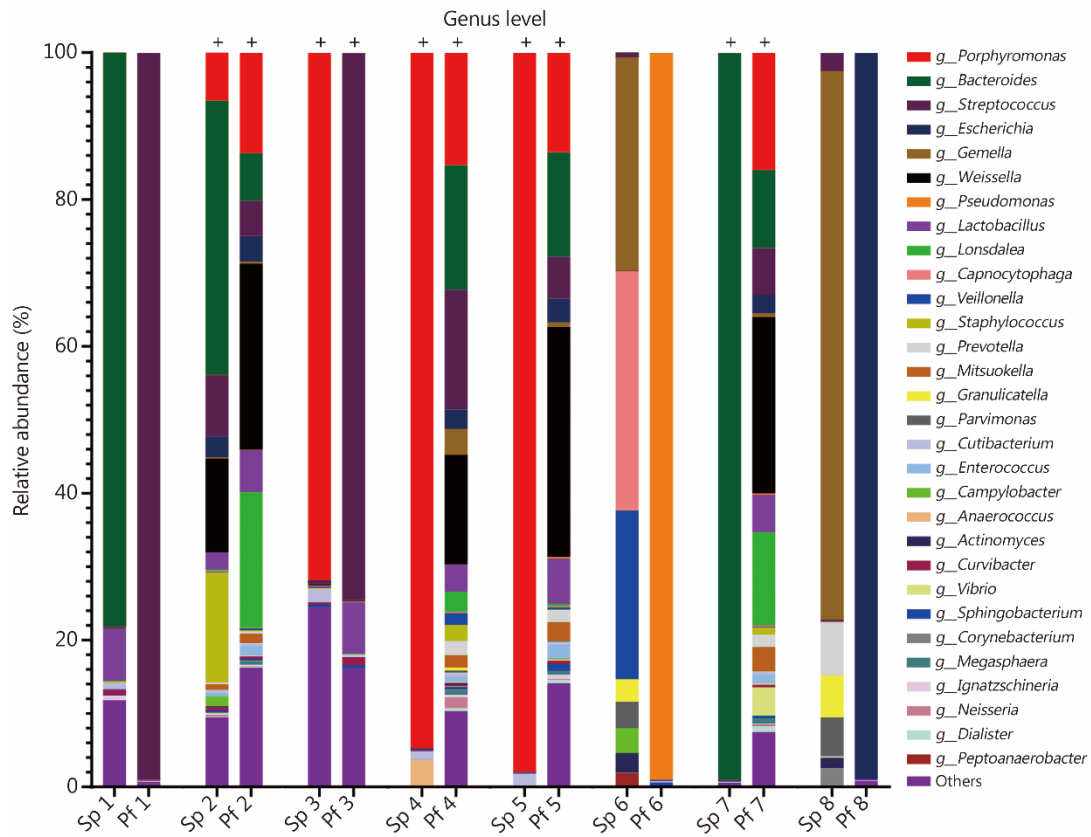

33

34 **Fig. S2** Histogram of relative abundance of microbial composition at the genus level in  
 35 subgingival plaque (Sp) and prostatic fluid (Pf) of 8 patients. Each bar represents a subject  
 36 sample and each colored box represents a bacterial genus. + indicates that *P. gingivalis* was  
 37 detected

38

39

40

41

42

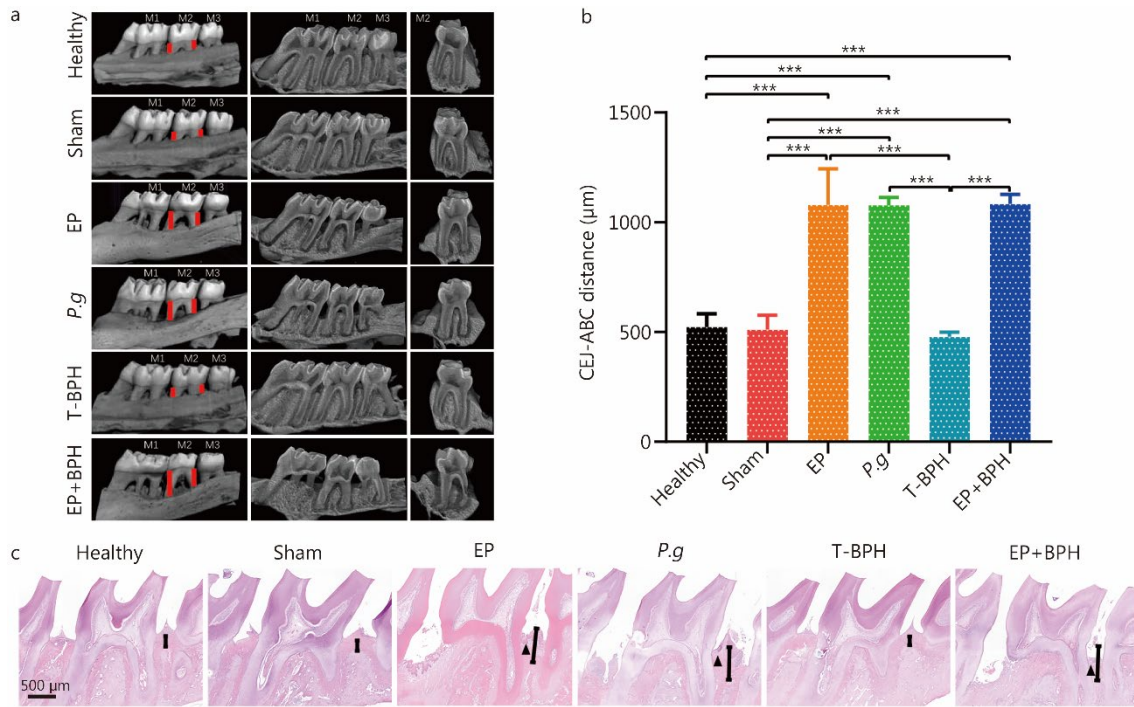

43

44 **Fig. S3** Alveolar bone loss and histological changes in rat periodontal tissues. **a**  
 45 Representative image obtained by micro-CT. The red lines showed the linear distance  
 46 from the cement-enamel junction (CEJ) to the alveolar bone crest (ABC) for the maxillary  
 47 second molar. **b** Quantitative analysis of the CEJ-ABC distance from the healthy, sham,  
 48 EP, *P.g*, T-BPH and EP + BPH groups. Data are presented as mean  $\pm$  SD, \*\*\* $P$  < 0.001. **c**  
 49 Representative figures from HE staining for the second maxillary alveolar bones (arrows  
 50 indicate inflammatory changes in the gingival epithelium, scale plates indicate linear  
 51 distance from CEJ to ABC; original magnification  $\times 40$ ). \*\*\* $P$  < 0.001. EP ligature-  
 52 induced experimental periodontitis group, *P.g porphyromonas gingivalis* induced BPH  
 53 group, T-BPH testosterone-induced BPH group, EP+BPH composite group of EP and  
 54 BPH

55

56

57

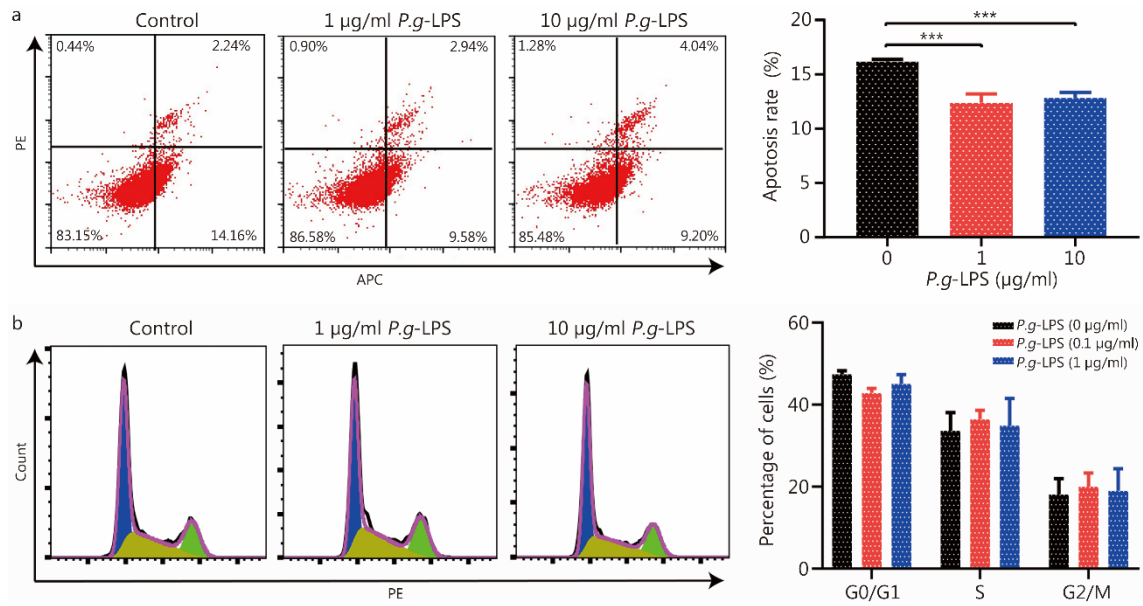

58

59 **Fig. S4** Flow cytometry analyses for apoptosis and cell cycle of WPMY-1 cells treated  
 60 with selected concentrations of *P. gingivalis* LPS. **a** Flow cytometry analyses for  
 61 apoptosis of WPMY-1 cells treated with selected concentrations of 0, 1 and 10  $\mu\text{g/ml}$  *P.g*-  
 62 LPS for 24 h, respectively. **b** Flow cytometry analyses for cell cycle in WPMY-1 cells  
 63 treated with selected concentrations of 0, 1 and 10  $\mu\text{g/ml}$  *P.g*-LPS for 24 h, respectively.  
 64 Data are expressed as mean  $\pm$  SD. \* $P < 0.05$ , \*\*\* $P < 0.001$ . *P.g*-LPS *Porphyromonas*  
 65 *gingivalis* lipopolysaccharide, PE phycoerythrin, APC allophycocyanin

66

67
